# Supplementary material
Source: PubMed Central journal article supplement (PMC5007876)

**SUPPLEMENTAL DATA**

| <b>Supplemental Table 1: Demographics and characteristics of study participants</b> |                    |                     |
|-------------------------------------------------------------------------------------|--------------------|---------------------|
|                                                                                     | <b>Lean (n=15)</b> | <b>Obese (n=12)</b> |
| Male, n (%)                                                                         | 3 (20%)            | 6 (50%)             |
| Age, years [mean ± SD]                                                              | 33.3 ± 9.5         | 44.8 ± 9.1          |
| White, n (%)                                                                        | 13 (87%)           | 9 (75%)             |
| BMI, kg/m <sup>2</sup> [mean ± SD]                                                  | 21.7 ± 1.7         | 36.0 ± 4.8          |

| <b>Supplemental Table 2: Adipose tissue in lean (n=4) and obese (n=4) mice as quantified by micro-CT imaging</b> |                           |                                 |                |
|------------------------------------------------------------------------------------------------------------------|---------------------------|---------------------------------|----------------|
| <b>Adipose Tissue, mm<sup>2</sup></b>                                                                            | <b>Lean Mice (ND-fed)</b> | <b>Obese Mice (60% HFD-fed)</b> | <b>P-Value</b> |
| Thigh IMAT/PMAT                                                                                                  | 2.14 (1.7–2.5)            | 47.94 (28.6–65.8)               | 0.021          |
| Calf IMAT/PMAT                                                                                                   | 0.18 (0.11–0.31)          | 8.29 (3.8–14.5)                 | 0.043          |
| Total IMAT/PMAT                                                                                                  | 2.3 (1.5–3.3)             | 56.4 (34.9–77.4)                | 0.021          |
| VAT                                                                                                              | 45.3 (28.1–68.7)          | 288.8 (270.2–295.2)             | 0.021          |
| SAT                                                                                                              | 13.8 (10.5–18.9)          | 125.3 (100.3–147.1)             | 0.021          |

IMAT/PMAT: intermuscular adipose tissue/perimuscular adipose tissue; VAT: abdominal visceral adipose tissue; SAT: abdominal subcutaneous adipose tissue. Values are reported as median (interquartile range). P-values were computed using the nonparametric Kruskal–Wallis test (SAS 9.3). All tests were 2-sided.

## **Supplemental Figure Legends**

**Supplemental Figure 1:** Quantitative RT-PCR analysis of inflammatory gene expression in SM. The entire quadriceps SM (including muscle fibers, IMAT, and PMAT) harvested from mice fed normal diet (ND; n=6–8 mice/group) or high-fat diet (HFD; n=8–10 mice/group) for 12 weeks were analyzed by quantitative RT-PCR. \*P<0.05, \*\*P<0.01, \*\*\*P<0.001 compared with ND group.

**Supplemental Figure 2: Flow cytometric analysis of macrophages and T cells in SM.** (A) Gating example of F4/80<sup>+</sup> macrophages and F4/80<sup>+</sup>CD11c<sup>+</sup> M1 macrophages. (B) Example of gating total CD3<sup>+</sup>, CD4<sup>+</sup>, and CD8<sup>+</sup> T cells in SM of ND-fed mice.

**Supplemental Figure 3: Immunohistochemical staining of sections of quadriceps isolated from ND-fed mice under 10x magnification**

**Supplemental Figure 4: Representative images of extramyocellular adipose tissue in mouse fed lower-fat diet.** Cross-sectional micro-CT images of the proximal, mid, and distal thigh and midcalf for a mouse fed lower-fat diet (panels A–D) with corresponding adipose tissue superimposed in red (panels E–H).

**Supplemental Figure 5: Representative images of extramyocellular adipose tissue in 60% HFD-fed mouse.** Cross-sectional micro-CT images of the proximal, mid, and distal thigh and

midcalf for a mouse fed 60% HFD (panels A–D) with corresponding adipose tissue superimposed in red (panels E–H).

**Supplemental Figure 6: Representative images of visceral adipose tissue in lean and obese mice.** Cross-sectional micro-CT images of the abdomen and adipose tissue for a mouse fed lower-fat diet (panels A and B) and a mouse fed 60% HFD (panels C and D). VAT is shown in red, and SAT is shown in yellow.

**Supplemental Figure 7: Obesity-induced SM and systemic insulin resistance.** (A)

Homeostasis model assessment of insulin resistance (HOMA-IR) in lean and 60% HFD-fed WT mice (n=4 mice/group). (B) Representative immunoblot and quantification of serine-phosphorylated Akt [P-Akt (S473)] protein expression in SM of mice fed ND or 60% HFD and injected with 1.5 U/kg body weight regular human insulin or PBS 10 minutes prior to sacrifice. The levels of P-Akt (S473) were expressed as P-Akt/Akt ratio. Insulin-stimulated P-Akt/Akt ratio was compared between lean and obese groups. \*P<0.05, \*\*\*P<0.001 compared with lean controls.

**Supplemental Figure 8: The effect of T<sub>H</sub>1 cells on myotube inflammation and metabolic functions and the involvement of the JAK/STAT pathway.** (A) Representative immunoblot

and quantification of total STAT1 protein and tyrosine<sup>701</sup> phosphorylated STAT1 (P-STAT1) protein in SM of mice fed ND or HFD for 12 weeks. (B) Quantitative RT-PCR analysis of proinflammatory cytokine and chemokine expression in differentiated C2C12 myotubes treated with T<sub>H</sub>1 supernatant with or without antibody neutralization of IFN $\gamma$  and T<sub>H</sub>1 supernatant in the

presence of JAK inhibitor I for 48 hours (n=6–10 samples/group). (C) mRNA level (n=4–6 samples/group) and the amount of P-STAT1 protein (n=5 samples/group) in C2C12 cells treated with T<sub>H</sub>1-conditioned medium with or without antibody neutralization of IFN $\gamma$ . (D) P-Akt (S473)/Akt protein levels in differentiated C2C12 cells treated with T<sub>H</sub>1 for 48 hours and exposed to 100 nM insulin for 15 minutes (n=4–5 samples/group). Results are shown as mean  $\pm$  SEM of 2 separate experiments, each with 2–3 samples/group. \*P<0.05, \*\*P<0.01, \*\*\*P<0.001 for comparison between control and each treatment group.

# Supplemental Figure 1

T cell and macrophage marker expression in SM of lean and obese mice

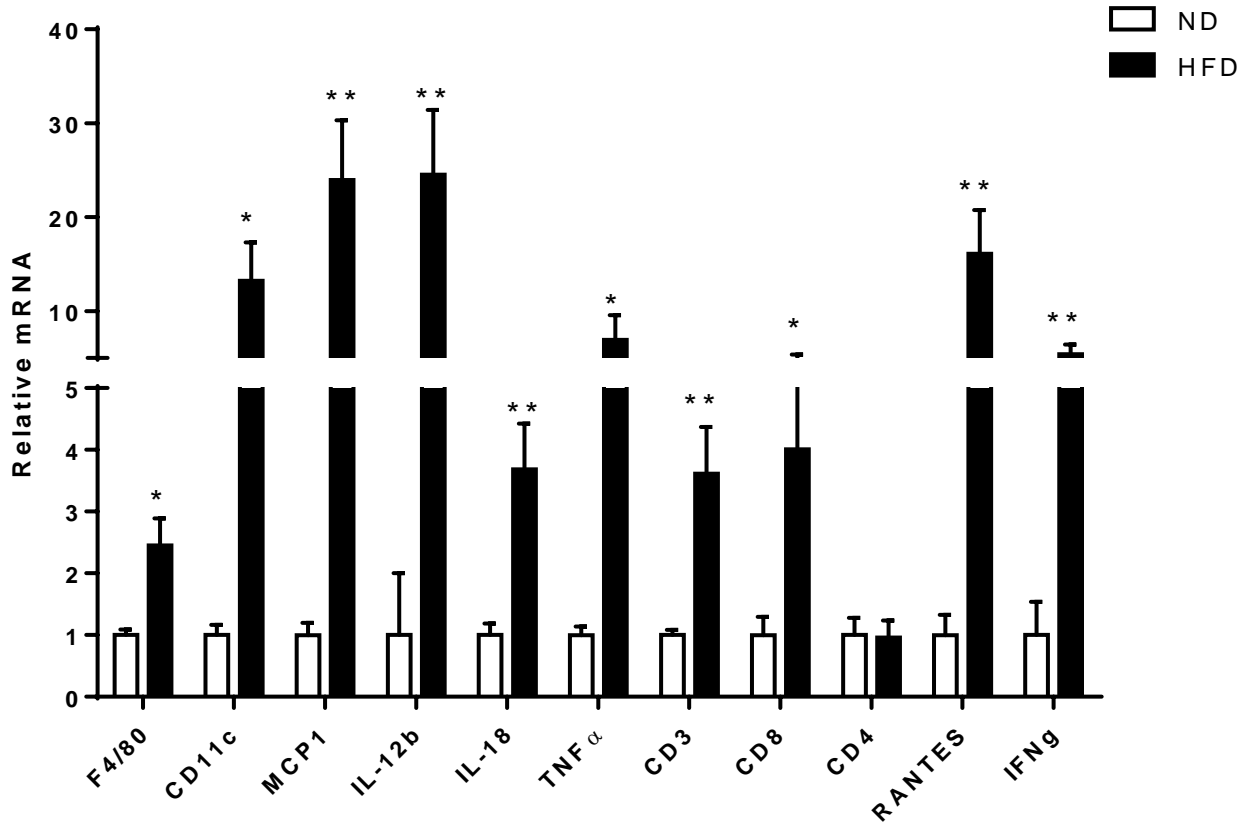

# Supplemental Figure 2

**A**

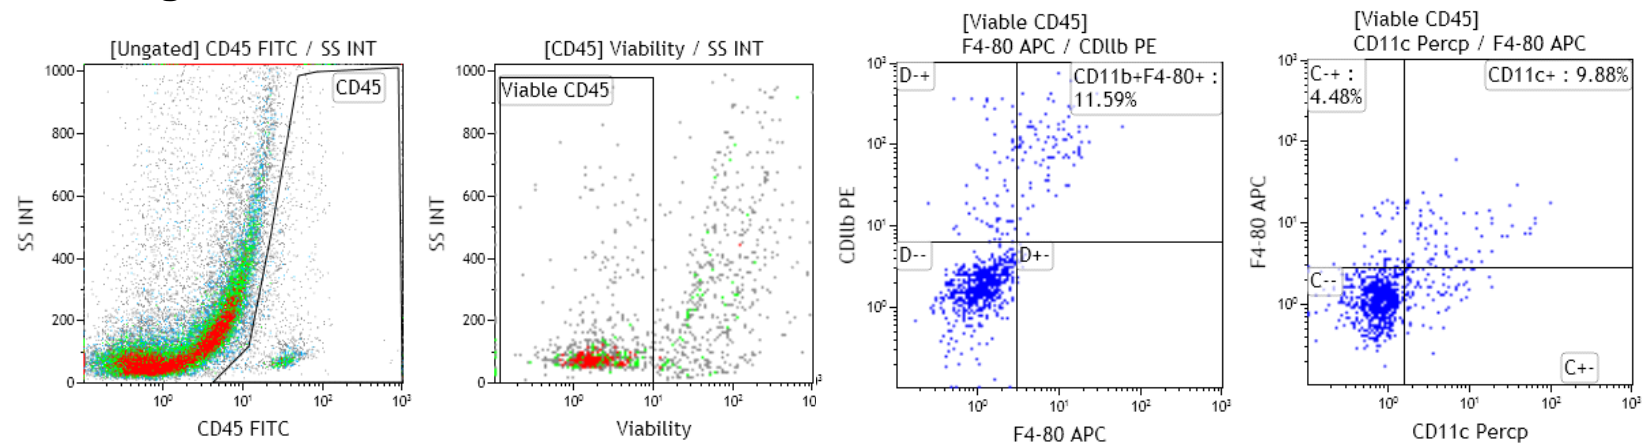

**B**

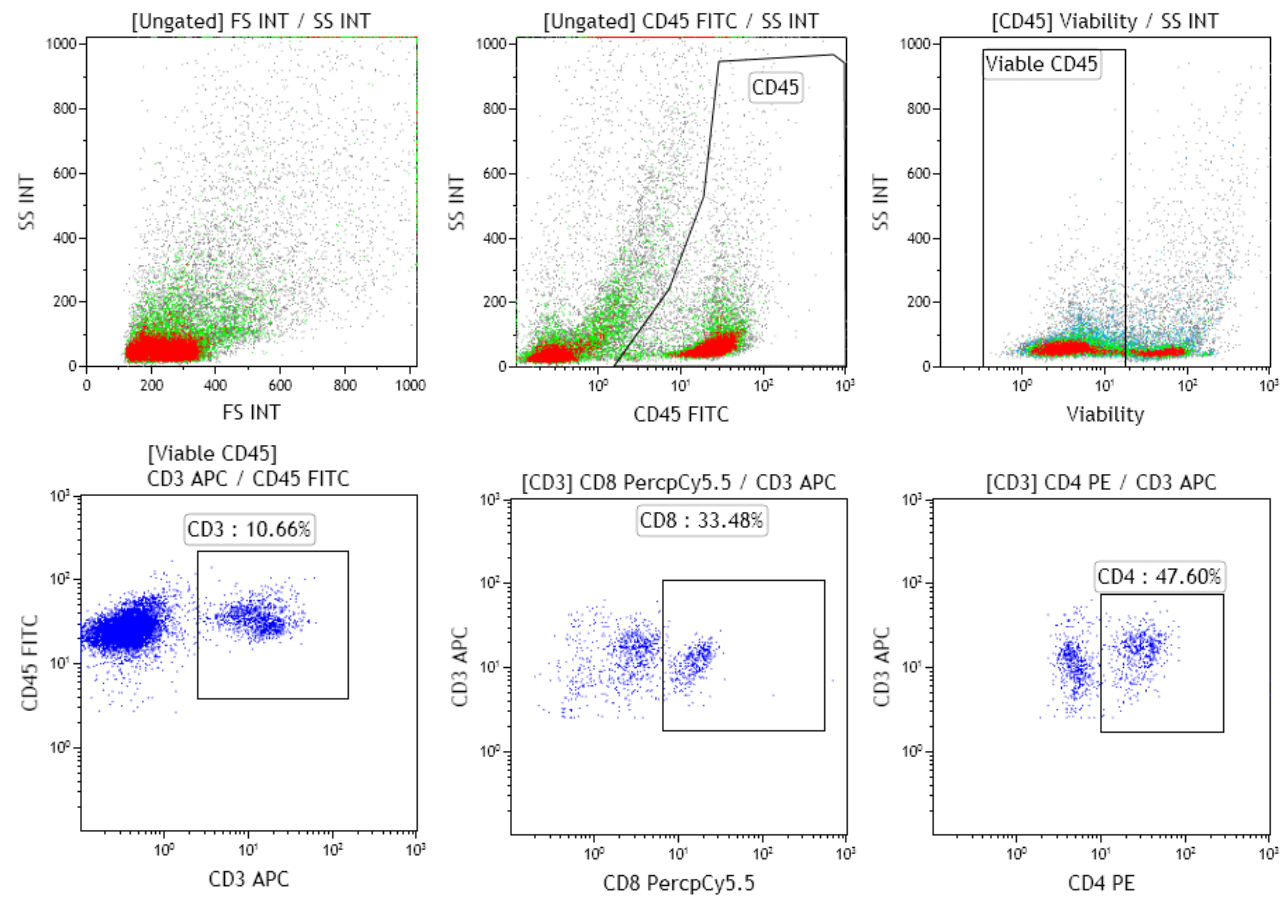

# Supplemental Figure 3

## Isotype control

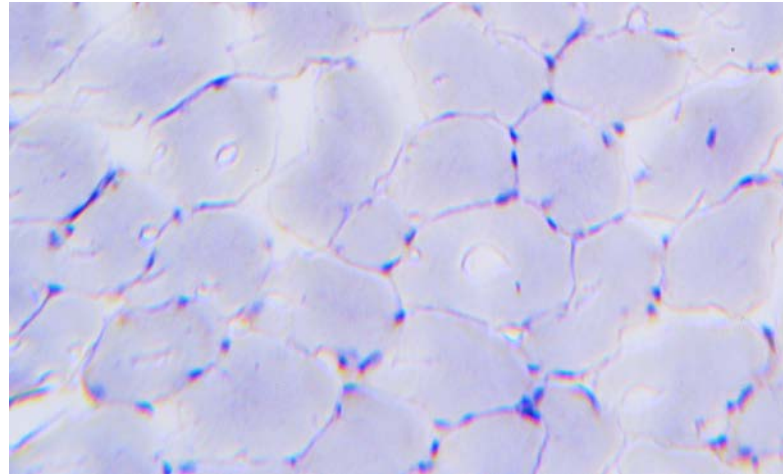

## Mac3 macrophages

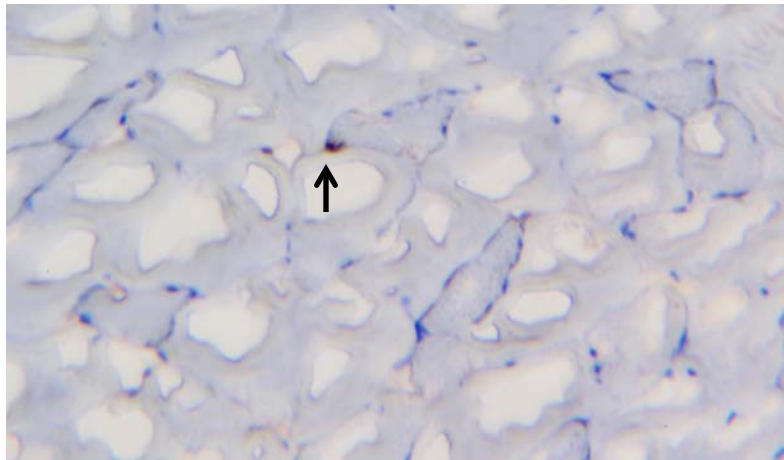

## CD3 T cells

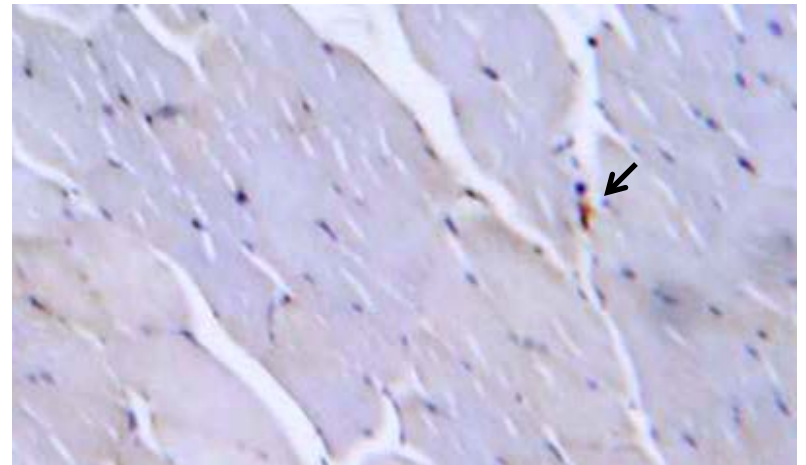

Supplemental Figure 4

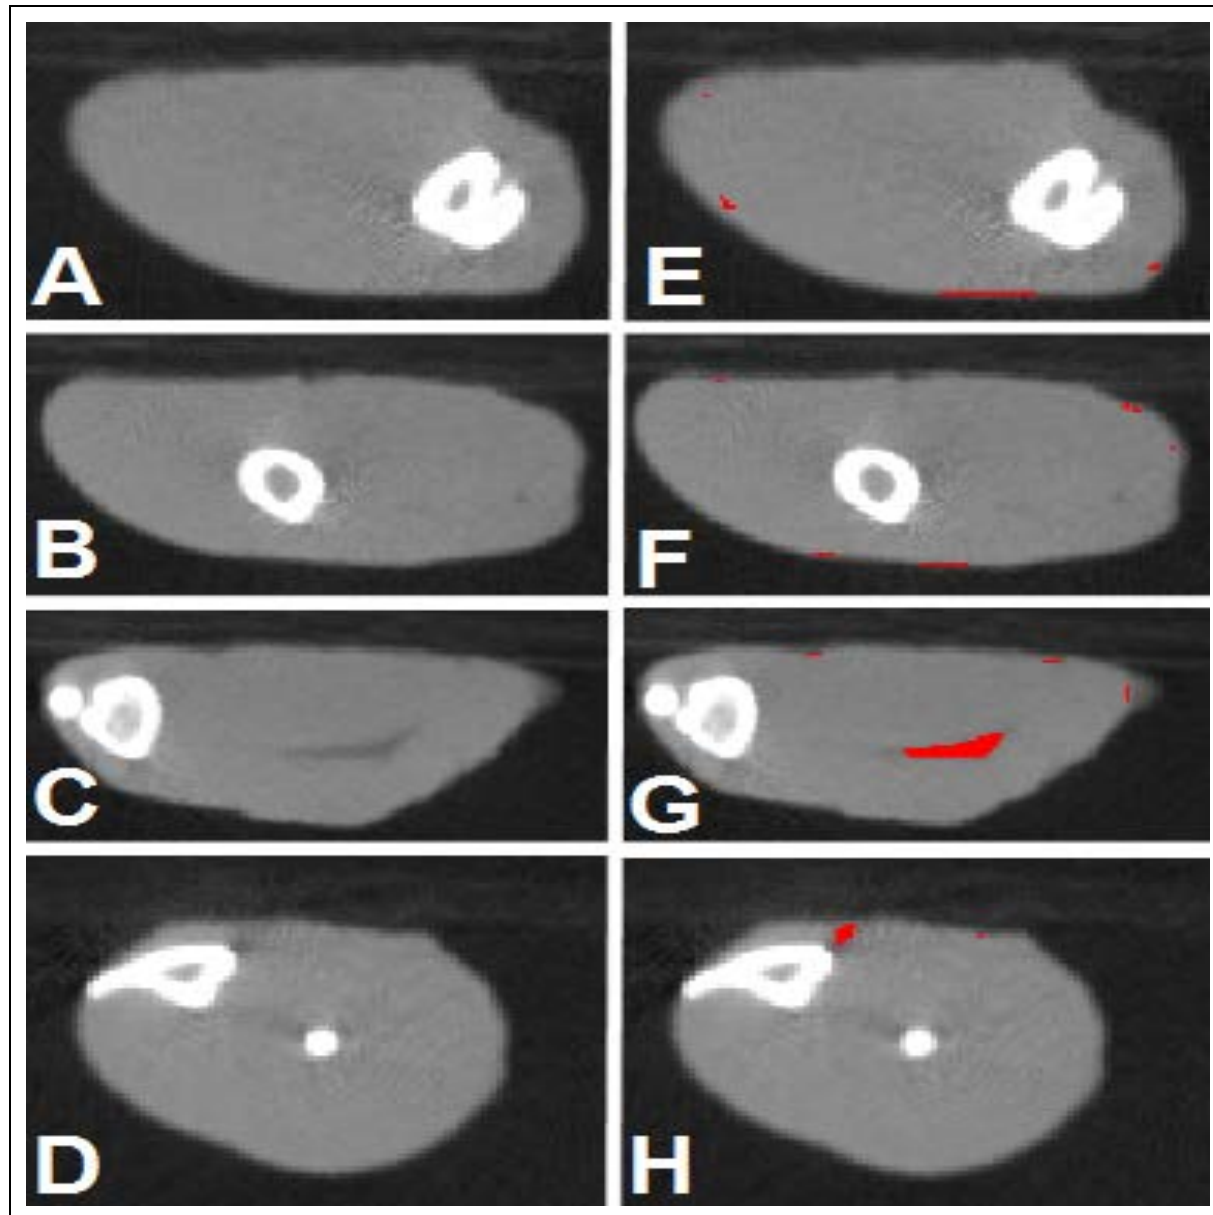



Supplemental Figure 5

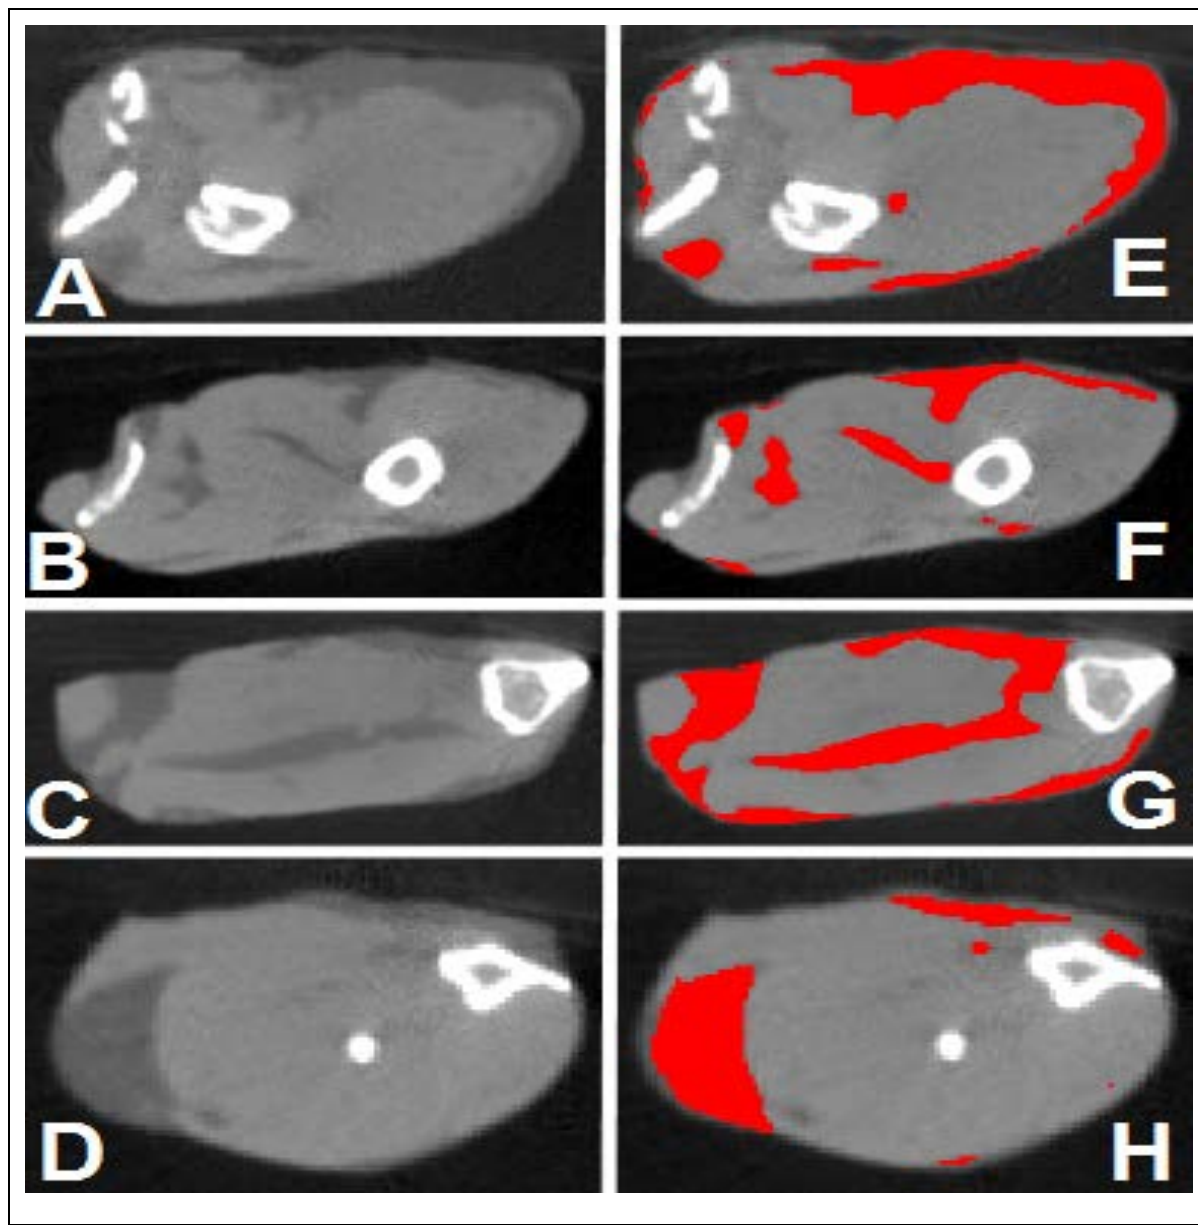

Supplemental Figure 6

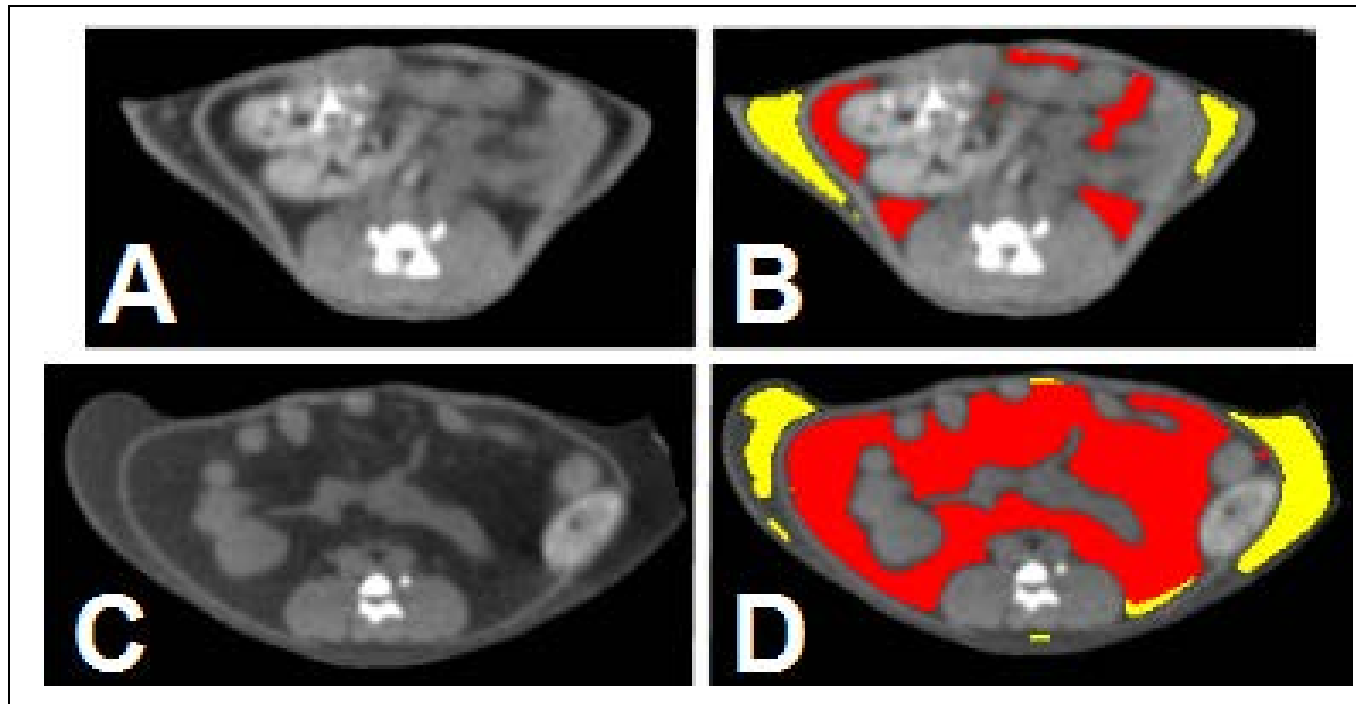

# Supplemental Figure 7

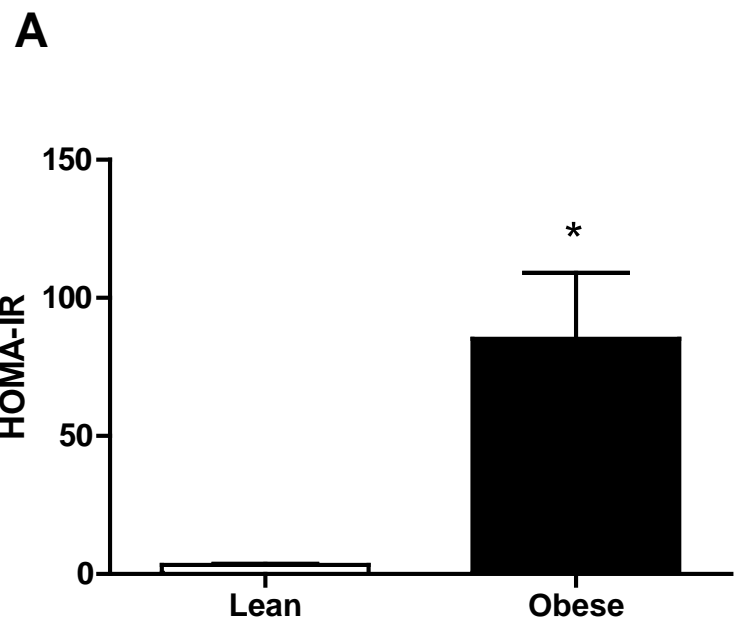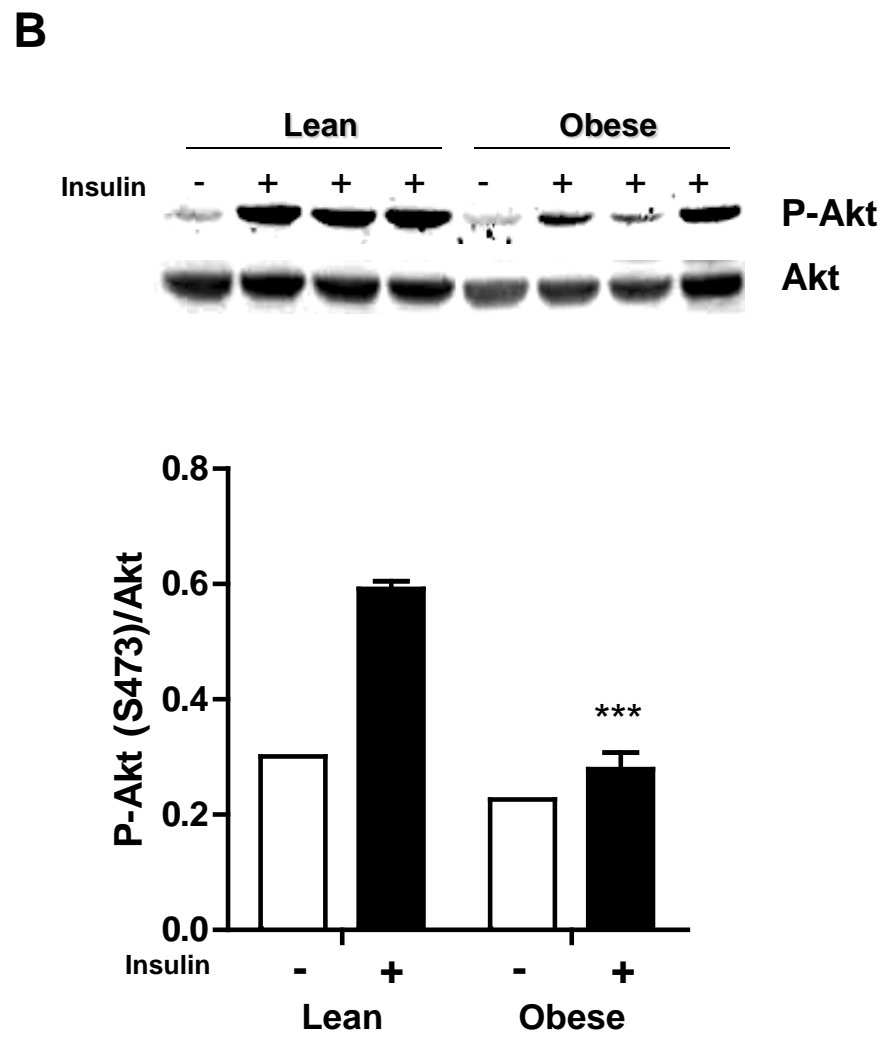

Supplemental Figure 8

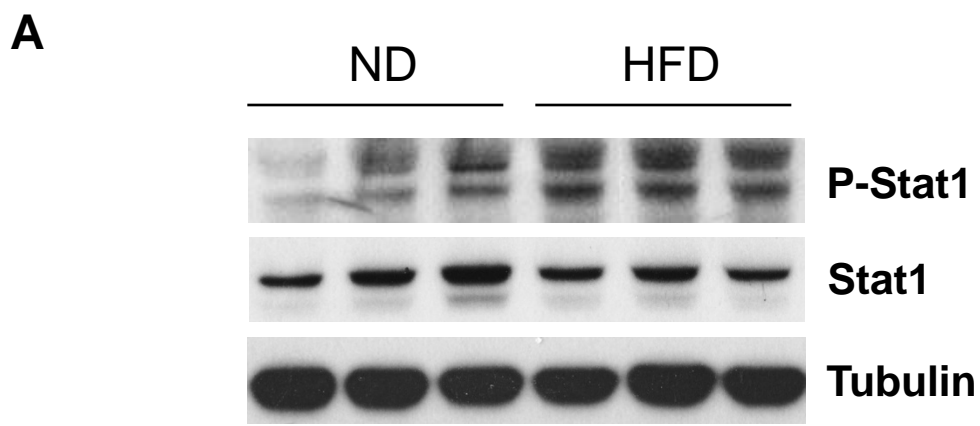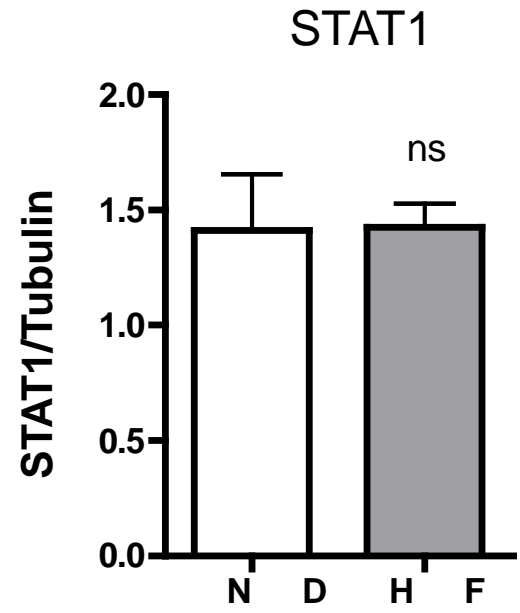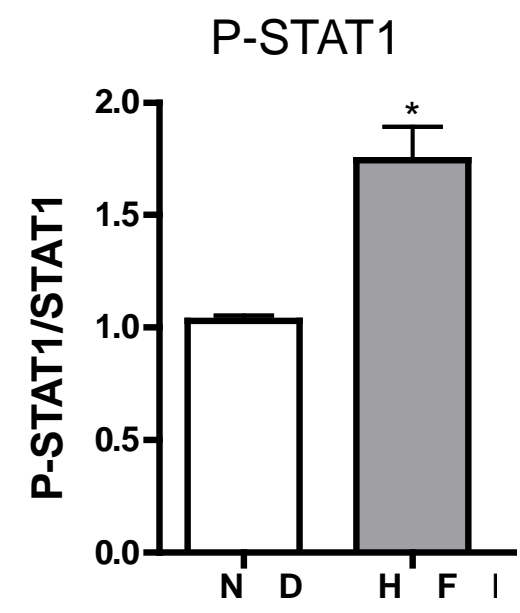

**B**

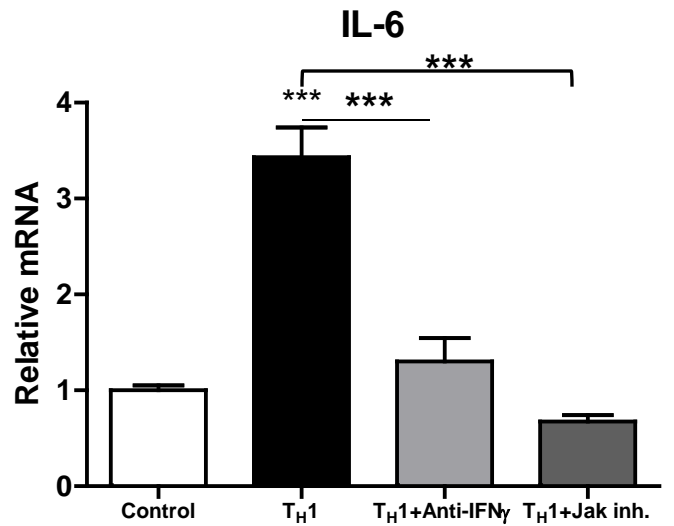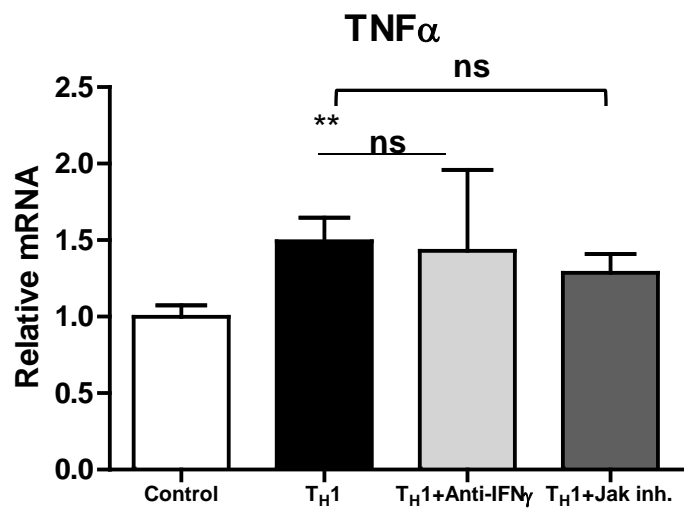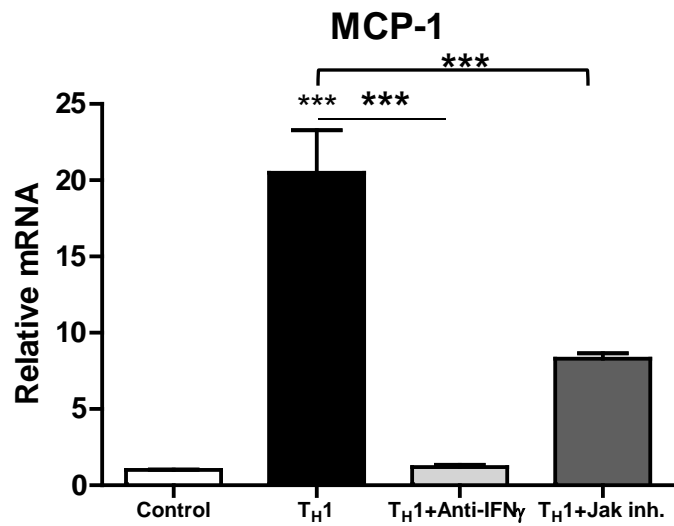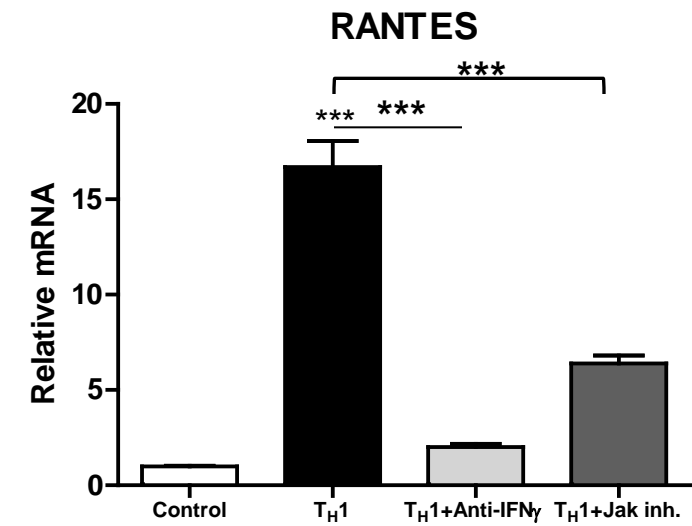

C

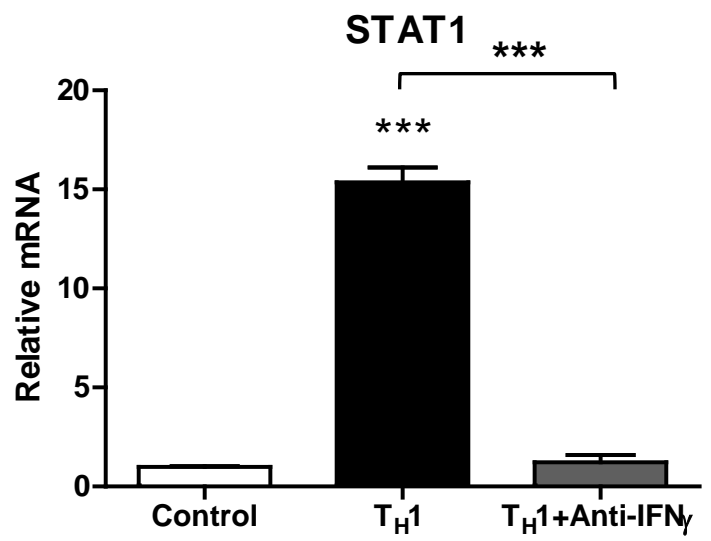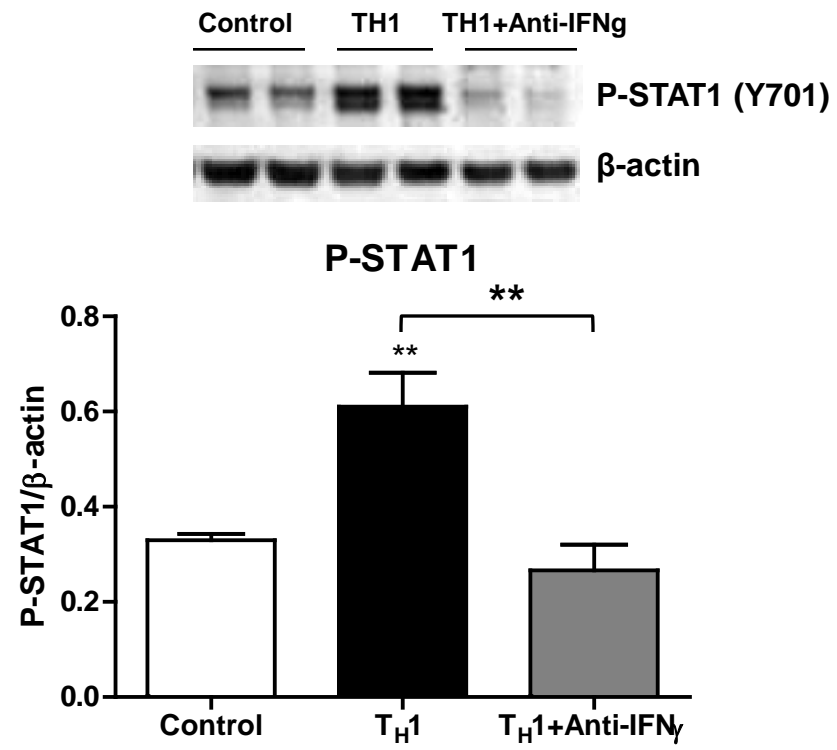

D

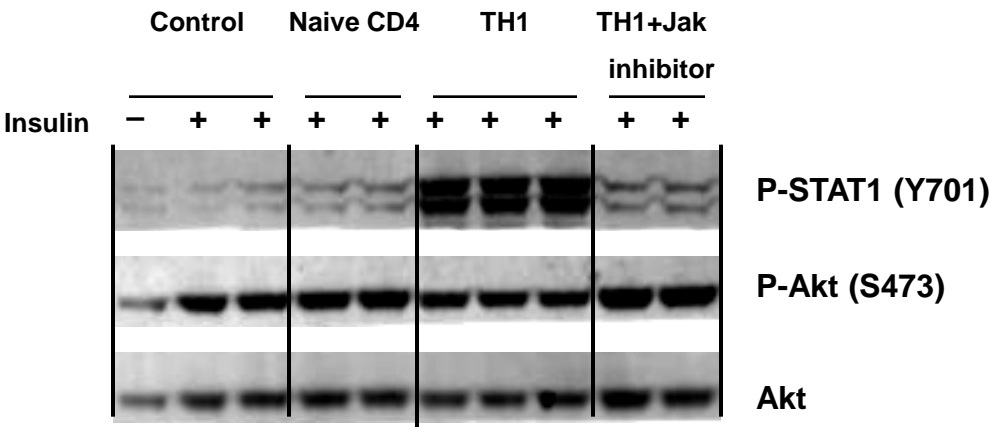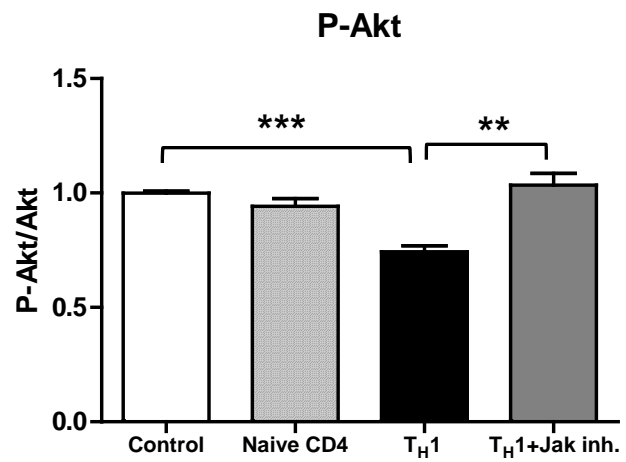

Supplement: NIHMS692630-supplement-1.pdf [file NIHMS692630-supplement-1.pdf]
